# Supplementary material for: Utilization of Poly(ADP-Ribose) Polymerase Inhibitors in Ovarian Cancer: A Retrospective Cohort Study of US Healthcare Claims Data
Source: PubMed Central journal article supplement — Adv Ther. 2021 Nov 2;39(1):328–45. doi: 10.1007/s12325-021-01959-5 (PMC8799547; doi:10.1007/s12325-021-01959-5), 2021-11-02
Supplement: 12325_2021_1959_MOESM1_ESM.pdf [file 12325_2021_1959_MOESM1_ESM.pdf]

## Utilization of poly(ADP-ribose) polymerase inhibitors in ovarian cancer: a retrospective cohort study of US healthcare claims data

Rebecca C Arend (0000-0003-2108-3426),<sup>a\*</sup> David M O'Malley (0000-0002-2828-0177),<sup>b\*</sup> Susana Banerjee (0000-0002-8840-7934),<sup>c</sup> Kimmie McLaurin,<sup>d</sup> Richard Davidson,<sup>e</sup> Gráinne H Long (0000-0001-5080-9885)<sup>e</sup>

<sup>a</sup>Department of Obstetrics and Gynecology, Division of Gynecologic Oncology, University of Alabama at Birmingham, 619 19th Street South, 176F Rm 10250, Birmingham, AL 35249, USA; <sup>b</sup>The Ohio State University and James Cancer Center, M210 Starling Loving Hall, 320 West 10th Avenue, Columbus, OH 43210, USA; <sup>c</sup>The Royal Marsden NHS Foundation Trust and Institute of Cancer Research, Fulham Road, London, SW3 6JJ, UK; <sup>d</sup>AstraZeneca Pharmaceuticals LP, One MedImmune Way, Gaithersburg, MD 20878, USA; <sup>e</sup>AstraZeneca Pharmaceuticals LP, City House, 136 Hills Road, Cambridge, CB2 8PA UK

\*These authors contributed equally to this work

**Corresponding author:** Rebecca C Arend, MD, MSPH, Department of Obstetrics and Gynecology, Division of Gynecologic Oncology, University of Alabama at Birmingham, 619 19<sup>th</sup> Street South, 176F Rm 10250, Birmingham, AL 35249, USA. Email: [rarend@uabmc.edu](mailto:rarend@uabmc.edu); office phone: +1-205-934-4986; office fax: +1-205-975-6174

## **Supplementary material**

### **Supplementary methods**

Sensitivity analyses were performed to test the robustness of estimates; these included:

1. Analysis of incident clinical events of interest (CEIs) (ie for each CEI, patients with evidence of that CEI at baseline were excluded) for each poly(ADP-ribose) polymerase (PARP) inhibitors (PARPi) index regimen by starting dose, specifically below the indicated dose and at the highest indicated dose
2. A reduction of the permitted treatment gap from 90 days to 60 and 45 days in the calculation of persistence
3. Analysis of CEIs by index PARPi regimen for the subpopulation of patients who persisted with their PARPi regimen

**Supplementary Table 1. US FDA approved indications and approval timelines of licensed PARPi**

| <b>Drug</b>   | <b>Indication</b>                                                                                                                                                                                                                                                                                                                                                                                            | <b>Year of approval</b> |
|---------------|--------------------------------------------------------------------------------------------------------------------------------------------------------------------------------------------------------------------------------------------------------------------------------------------------------------------------------------------------------------------------------------------------------------|-------------------------|
| Olaparib [1]  | Treatment of adult patients with deleterious or suspected deleterious germline BRCA-mutated advanced ovarian cancer who have been treated with $\geq 3$ prior lines of chemotherapy                                                                                                                                                                                                                          | 2014                    |
|               | Maintenance treatment of adult patients with recurrent epithelial ovarian, fallopian tube or primary peritoneal cancer who are in complete or partial response to platinum-based chemotherapy                                                                                                                                                                                                                | 2017                    |
|               | Maintenance treatment of adult patients with deleterious or suspected deleterious germline or somatic BRCA-mutated advanced epithelial ovarian, fallopian tube or primary peritoneal cancer who are in complete or partial response to first-line platinum-based chemotherapy                                                                                                                                | 2018                    |
|               | In combination with bevacizumab for the maintenance treatment of adult patients with advanced epithelial ovarian, fallopian tube or primary peritoneal cancer who are in complete or partial response to first-line platinum-based chemotherapy and whose cancer is associated with HRD-positive status (either a deleterious or suspected deleterious BRCA mutation, and/or genomic instability)            | 2020                    |
| Niraparib [2] | Maintenance treatment of adult patients with recurrent epithelial ovarian, fallopian tube or primary peritoneal cancer who are in a complete or partial response to platinum-based chemotherapy                                                                                                                                                                                                              | 2017                    |
|               | Treatment of adult patients with advanced ovarian, fallopian tube or primary peritoneal cancer who have been treated with $\geq 3$ prior chemotherapy regimens and whose cancer is associated with HRD-positive status (a deleterious or suspected deleterious BRCA mutation, or genomic instability and with disease progression more than 6 months after response to the last platinum-based chemotherapy) | 2019                    |
|               | Maintenance treatment of adult patients with advanced epithelial ovarian, fallopian tube or primary peritoneal cancer who are in a complete or partial response to first-line platinum-based chemotherapy                                                                                                                                                                                                    | 2020                    |
| Rucaparib [3] | Treatment of adult patients with deleterious BRCA mutation (germline and/or somatic)-associated epithelial ovarian, fallopian tube or primary peritoneal cancer who have been treated with $\geq 2$ chemotherapies                                                                                                                                                                                           | 2016                    |
|               | Maintenance treatment of adult patients with recurrent epithelial ovarian, fallopian tube or primary peritoneal cancer who are in a complete or partial response to platinum-based chemotherapy                                                                                                                                                                                                              | 2018                    |

**Supplementary Table 2. ICD-9/10 code criteria for diagnosis of ovarian cancer**

| Code type    | Code  | Description                                                               |
|--------------|-------|---------------------------------------------------------------------------|
| ICD-9-CM DX  | 1830  | Malignant neoplasm of ovary                                               |
| ICD-9-CM DX  | 1832  | Malignant neoplasm of fallopian tube                                      |
| ICD-9-CM DX  | 1580  | Malignant neoplasm of retroperitoneum                                     |
| ICD-9-CM DX  | 1588  | Malignant neoplasm of specified parts of peritoneum                       |
| ICD-9-CM DX  | 1589  | Malignant neoplasm of peritoneum, unspecified                             |
| ICD-10-CM DX | C561  | Malignant neoplasm of right ovary                                         |
| ICD-10-CM DX | C562  | Malignant neoplasm of left ovary                                          |
| ICD-10-CM DX | C569  | Malignant neoplasm of unspecified ovary                                   |
| ICD-10-CM DX | C5700 | Malignant neoplasm of unspecified fallopian tube                          |
| ICD-10-CM DX | C5701 | Malignant neoplasm of right fallopian tube                                |
| ICD-10-CM DX | C5702 | Malignant neoplasm of left fallopian tube                                 |
| ICD-10-CM DX | C480  | Malignant neoplasm of retroperitoneum                                     |
| ICD-10-CM DX | C481  | Malignant neoplasm of specified parts of peritoneum                       |
| ICD-10-CM DX | C482  | Malignant neoplasm of peritoneum, unspecified                             |
| ICD-10-CM DX | C488  | Malignant neoplasm of overlapping sites of retroperitoneum and peritoneum |

**Supplementary Table 3. Prevalence of CEI during 6-month pre-index baseline period by index PARPi regimen**

| Presence of CEI, n (%)              | Olaparib<br>N=303 | Niraparib<br>N=348 | Rucaparib<br>N=162 |
|-------------------------------------|-------------------|--------------------|--------------------|
| Any                                 | 277 (91.4)        | 325 (93.4)         | 139 (85.8)         |
| Hematologic                         | 157 (51.8)        | 192 (55.2)         | 69 (42.6)          |
| AML/MDS                             | 0 (0)             | 2 (0.6)            | 0 (0)              |
| AML                                 | 0 (0)             | 1 (0.3)            | 0 (0)              |
| MDS                                 | 0 (0)             | 1 (0.3)            | 0 (0)              |
| Anemia <sup>a</sup>                 | 110 (36.3)        | 119 (34.2)         | 49 (30.2)          |
| Leukopenia/neutropenia <sup>b</sup> | 87 (28.7)         | 98 (28.2)          | 36 (22.2)          |
| Thrombocytopenia or transfusion     | 66 (21.8)         | 91 (26.1)          | 35 (21.6)          |
| Other                               | 262 (86.5)        | 311 (89.4)         | 133 (82.1)         |
| Acute kidney injury                 | 15 (5.0)          | 23 (6.6)           | 16 (9.9)           |
| Arthralgia                          | 70 (23.1)         | 74 (21.3)          | 31 (19.1)          |
| Constipation/diarrhea               | 58 (19.1)         | 72 (20.7)          | 34 (21.0)          |
| Constipation                        | 43 (14.2)         | 54 (15.5)          | 27 (16.7)          |
| Diarrhea                            | 21 (6.9)          | 29 (8.3)           | 9 (5.6)            |
| Dermatitis/rash/photosensitivity    | 14 (4.6)          | 27 (7.8)           | 13 (8.0)           |
| Dermatitis/rash                     | 13 (4.3)          | 27 (7.8)           | 13 (8.0)           |
| Photosensitivity                    | 1 (0.3)           | 0 (0)              | 0 (0)              |
| Fatigue                             | 75 (24.8)         | 76 (21.8)          | 34 (21.0)          |
| Hypertension                        | 113 (37.3)        | 140 (40.2)         | 63 (38.9)          |
| Infection                           | 162 (53.5)        | 186 (53.4)         | 81 (50.0)          |
| Insomnia                            | 25 (8.3)          | 20 (5.7)           | 14 (8.6)           |
| Nausea/vomiting                     | 106 (35.0)        | 114 (32.8)         | 55 (34.0)          |
| Nausea                              | 99 (32.7)         | 109 (31.3)         | 55 (34.0)          |
| Vomiting                            | 14 (4.6)          | 14 (4.0)           | 7 (4.3)            |
| Pneumonitis                         | 1 (0.3)           | 1 (0.3)            | 0 (0)              |
| Transaminitis                       | 0 (0)             | 5 (1.4)            | 2 (1.2)            |

<sup>a</sup>CEI based on total claims comprising a diagnosis code only; <sup>b</sup>CEI based on total claims comprising a diagnosis code only, a procedure code only, or both a diagnosis and a procedure code

**Supplementary Table 4. Association between PARPi treatment group and rate of any, hematologic, and other clinical events of interest**

| Pairwise comparison of PARPi treatment groups | Any CEI |        |        | Hematologic CEI |        |        | Other CEI |        |        |
|-----------------------------------------------|---------|--------|--------|-----------------|--------|--------|-----------|--------|--------|
|                                               | HR      | LCL    | UCL    | HR              | LCL    | UCL    | HR        | LCL    | UCL    |
| Rucaparib versus olaparib                     | 1.1604  | 0.9421 | 1.4291 | 1.2474          | 0.9528 | 1.6331 | 1.2151    | 0.9825 | 1.5028 |
| Niraparib versus olaparib                     | 1.3452  | 1.1375 | 1.5909 | 1.4756          | 1.1932 | 1.8249 | 1.2875    | 1.0845 | 1.5284 |
| Niraparib versus rucaparib                    | 1.1593  | 0.9502 | 1.4144 | 1.1829          | 0.9206 | 1.5200 | 1.0595    | 0.8661 | 1.2962 |

Analysis by multivariable Cox proportional hazards regression stratified by presence of a relevant CEI at baseline and adjusted for index PARPi regimen, CCI score, prior treatment with bevacizumab, and cancer-related surgery during the baseline period. Sample size: N=813; n=715 with any CEI; n=452 with hematologic CEI; n=679 with other CEI. LCL, 95% lower confidence limit; UCL, 95% upper confidence limit

**Supplementary Table 5. Association between PARPi treatment group and time to discontinuation of the PARPi regimen**

| Pairwise comparison of PARPi treatment groups | Discontinuation |        |        |
|-----------------------------------------------|-----------------|--------|--------|
|                                               | HR              | LCL    | UCL    |
| Rucaparib versus olaparib                     | 1.4154          | 1.1063 | 1.8107 |
| Niraparib versus olaparib                     | 1.5198          | 1.2428 | 1.8585 |
| Niraparib versus rucaparib                    | 1.0738          | 0.8577 | 1.3443 |

Analysis by multivariable Cox proportional hazards regression stratified by presence of a relevant CEI at baseline and adjusted for index PARP inhibitor regimen, CCI score, prior treatment with bevacizumab, and cancer-related surgery during the baseline period. Sample size: N=813; n=519 discontinued

**Supplementary Table 6. All-cause healthcare-resource utilization and costs PPPM measured during the 6-month pre-index baseline period by index PARPi regimen**

|                                                 | Olaparib<br>N=303      | Niraparib<br>N=348       | Rucaparib<br>N=162     |
|-------------------------------------------------|------------------------|--------------------------|------------------------|
| <b>Inpatient</b>                                |                        |                          |                        |
| Patients with an admission, n (%)               | 94 (31.0)              | 98 (28.2)                | 54 (33.3)              |
| Number of inpatient admissions                  |                        |                          |                        |
| Mean (SD)                                       | 0.4 (0.8)              | 0.4 (0.8)                | 0.5 (0.9)              |
| Median [IQR]                                    | 0.0 [1.0]              | 0.0 [1.0]                | 0.0 [1.0]              |
| Length of stay, days                            |                        |                          |                        |
| Mean (SD)                                       | 1.6 (2.9)              | 1.4 (2.7)                | 1.6 (2.8)              |
| Median [IQR]                                    | 0.0 [3.0]              | 0.0 [2.0]                | 0.0 [3.0]              |
| <b>Outpatient ER visits</b>                     |                        |                          |                        |
| Patients with an ER visit, n (%)                | 88 (29.0)              | 96 (27.6)                | 35 (21.6)              |
| Number of ER visits                             |                        |                          |                        |
| Mean (SD)                                       | 0.6 (1.8)              | 0.4 (1.1)                | 0.3 (0.8)              |
| Median [IQR]                                    | 0.0 [1.0]              | 0.0 [1.0]                | 0.0 [0.0]              |
| <b>Outpatient office visits</b>                 |                        |                          |                        |
| Patients with an office visit, n (%)            | 300 (99.0)             | 348 (100.0)***           | 160 (98.8)†            |
| Number of office visits                         |                        |                          |                        |
| Mean (SD)                                       | 11.1 (5.0)             | 11.3 (5.9)               | 10.0 (5.3)*†           |
| Median [IQR]                                    | 11.0 [6.0]             | 10.0 [7.0]               | 9.0 [5.0]              |
| <b>Other outpatient services</b>                |                        |                          |                        |
| Patients with another outpatient service, n (%) | 303 (100.0)            | 348 (100.0)***           | 161 (99.4)***          |
| Number of services                              |                        |                          |                        |
| Mean (SD)                                       | 23.8 (13.4)            | 24.2 (12.3)              | 22.7 (13.4)            |
| Median [IQR]                                    | 22.0 [17.0]            | 22.0 [14.0]              | 20.0 [12.0]            |
| <b>Outpatient pharmacy</b>                      |                        |                          |                        |
| Patients with a prescription, n (%)             | 297 (98.0)             | 344 (98.9)               | 160 (98.8)             |
| Number of prescriptions                         |                        |                          |                        |
| Mean (SD)                                       | 18.3 (14.0)            | 18.3 (13.1)              | 18.1 (13.6)            |
| Median [IQR]                                    | 15.0 [15.0]            | 15.0 [15.5]              | 15.0 [16.0]            |
| Mean monthly inpatient costs (SD) <sup>a</sup>  | \$13,706<br>(\$28,329) | \$12,890<br>(\$32,991)   | \$12,081<br>(\$26,938) |
| Mean monthly outpatient costs (SD) <sup>a</sup> | \$63,889<br>(\$57,504) | \$80,083<br>(\$78,470)** | \$67,961<br>(\$66,585) |
| ER visits                                       | \$1265 (\$5197)        | \$696 (\$2154)           | \$393 (\$1129)*        |

|                                                                        |                        |                          |                        |
|------------------------------------------------------------------------|------------------------|--------------------------|------------------------|
| Outpatient office visits                                               | \$1994 (\$1453)        | \$1888 (\$1576)          | \$1753 (\$1479)        |
| Other outpatient services costs                                        | \$60,630<br>(\$56,748) | \$77,498<br>(\$77,904)** | \$65,815<br>(\$66,271) |
| Mean monthly outpatient pharmacy costs (SD) <sup>a</sup>               | \$2677 (\$5952)        | \$2330 (\$5002)          | \$2139 (\$6027)        |
| Mean monthly total medical costs, excluding pharmacy (SD) <sup>a</sup> | \$77,595<br>(\$68,159) | \$92,973<br>(\$88,694)*  | \$80,042<br>(\$72,704) |
| Mean monthly total costs (SD) <sup>a</sup>                             | \$80,272<br>(\$68,465) | \$95,304<br>(\$88,942)*  | \$82,181<br>(\$73,025) |

\* $P < 0.05$  versus olaparib; \*\* $P < 0.01$  versus olaparib; \*\*\* $P < 0.001$  versus olaparib; † $P < 0.05$  versus niraparib; statistical comparisons were performed using chi-squared or Fisher's exact tests for categorical variables and t-tests for continuous variables. <sup>a</sup>All dollar estimates are reported PPPM to account for variation in duration of the index PARP inhibitor regimen and were adjusted for inflation using the Medical Care Component of the Consumer Price Index and standardized to the value of the US dollar in 2018. In addition to costs, rows representing number of services have also been standardized to PPPM

**Supplementary Table 7. Prevalence of incident CEIs during the follow-up period by index PARPi regimen, based on starting dose**

| <b>Below highest indicated dose</b>                |                           |                            |                            |
|----------------------------------------------------|---------------------------|----------------------------|----------------------------|
| <b>Presence of incident<sup>a</sup> CEI, n (%)</b> | <b>Olaparib<br/>N=31</b>  | <b>Niraparib<br/>N=107</b> | <b>Rucaparib<br/>N=9</b>   |
| Any                                                | 19 (61.3)                 | 78 (72.9)                  | NC                         |
| Hematologic                                        | 11 (35.5)                 | 39 (36.4)                  | NC                         |
| Other                                              | 18 (58.1)                 | 70 (65.4)                  | NC                         |
| <b>Highest indicated dose<sup>b</sup></b>          |                           |                            |                            |
| <b>Presence of incident<sup>a</sup> CEI, n (%)</b> | <b>Olaparib<br/>N=271</b> | <b>Niraparib<br/>N=241</b> | <b>Rucaparib<br/>N=151</b> |
| Any                                                | 163 (60.1)                | 192 (79.9)***              | 110 (72.8)**               |
| Hematologic                                        | 66 (24.4)                 | 107 (44.4)***              | 53 (35.1)*                 |
| Other                                              | 143 (52.8)                | 155 (64.3)**               | 103 (68.2)**               |

\* $P < 0.05$  versus olaparib; \*\* $P < 0.01$  versus olaparib; \*\*\* $P < 0.001$  versus olaparib; statistical comparisons were performed using chi-squared or Fisher's exact tests for categorical variables. <sup>a</sup>Patients with evidence of a relevant CEI at baseline were excluded; <sup>b</sup>Highest indicated doses were taken from the prescribing information for each PARPi as 600, 800, 300, and 1200 mg/day for olaparib tablets, olaparib capsules, niraparib capsules, and rucaparib tablets, respectively. NC, not calculable

**Supplementary Table 8. Persistence among patients with at least 6 months of continuous enrollment by index PARPi regimen**

|                                                                                              | <b>Olaparib<br/>N=172</b> | <b>Niraparib<br/>N=251</b> | <b>Rucaparib<br/>N=117</b> |
|----------------------------------------------------------------------------------------------|---------------------------|----------------------------|----------------------------|
| Persistence <sup>a</sup> (no treatment gaps of >45 days) with the index PARPi regimen, n (%) | 99 (57.6)                 | 74 (29.5)***               | 54 (46.2)                  |
| Persistence <sup>a</sup> (no treatment gaps of >60 days) with the index PARPi regimen, n (%) | 103 (59.9)                | 85 (33.9)***               | 55 (47.0)*                 |

\* $P < 0.05$  versus olaparib; \*\*\* $P < 0.001$  versus olaparib; statistical comparisons were performed using chi-squared or Fisher's exact tests for categorical variables. <sup>a</sup>Persistence was determined among the subset of patients who had at least 6 months of follow-up and was indicated by no treatment gaps of >45 or >60 days during the 6-month post-index period

## Supplementary Figure 1. Patient attrition and selection

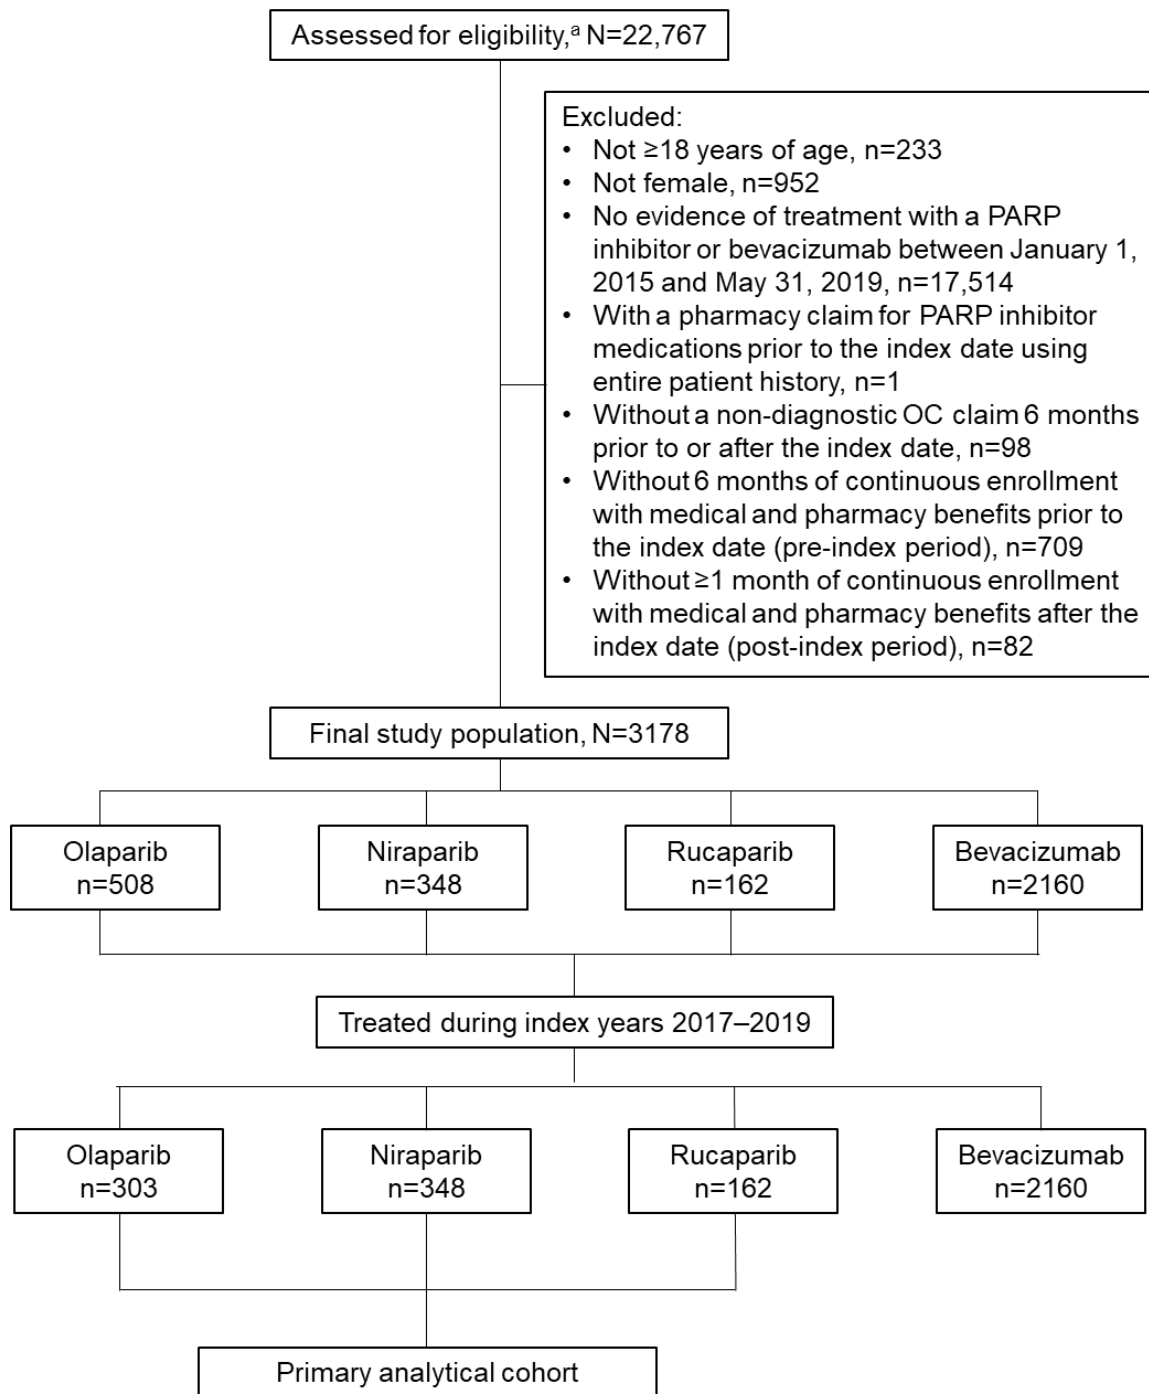

<sup>a</sup>Patients in the MarketScan® Commercial or Medicare Supplemental Databases with an ICD-9-CM or ICD-10-CM diagnosis code on one inpatient claim in any position or two non-diagnostic outpatient claims for epithelial ovarian, fallopian tube, or primary peritoneal cancer 30–365 days apart between January 1, 2015 and May 31, 2019 (first ovarian cancer diagnosis during the patient selection period = index date)



## Supplementary Figure 2. Diagram illustrating definition of persistence with PARPi index regimen

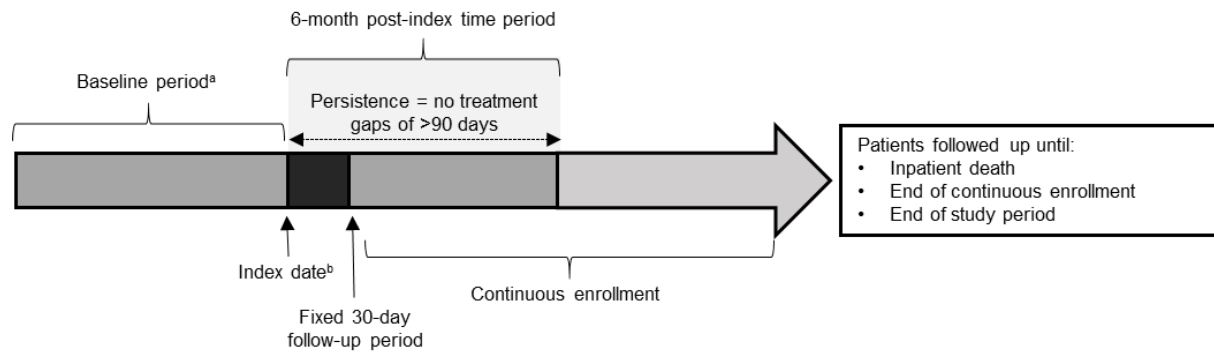

<sup>a</sup>At least 6 months of continuous enrollment in medical and pharmacy benefits and no prior PARPi claims in the patient history before the index date; <sup>b</sup>Date of first PARPi treatment

**Supplementary Figure 3. Kaplan–Meier curves showing time to (A–C) any and (D–F) hematologic CEIs in women with ovarian cancer treated with olaparib, niraparib, or rucaparib as the index PARPi regimen (2017–2019)**

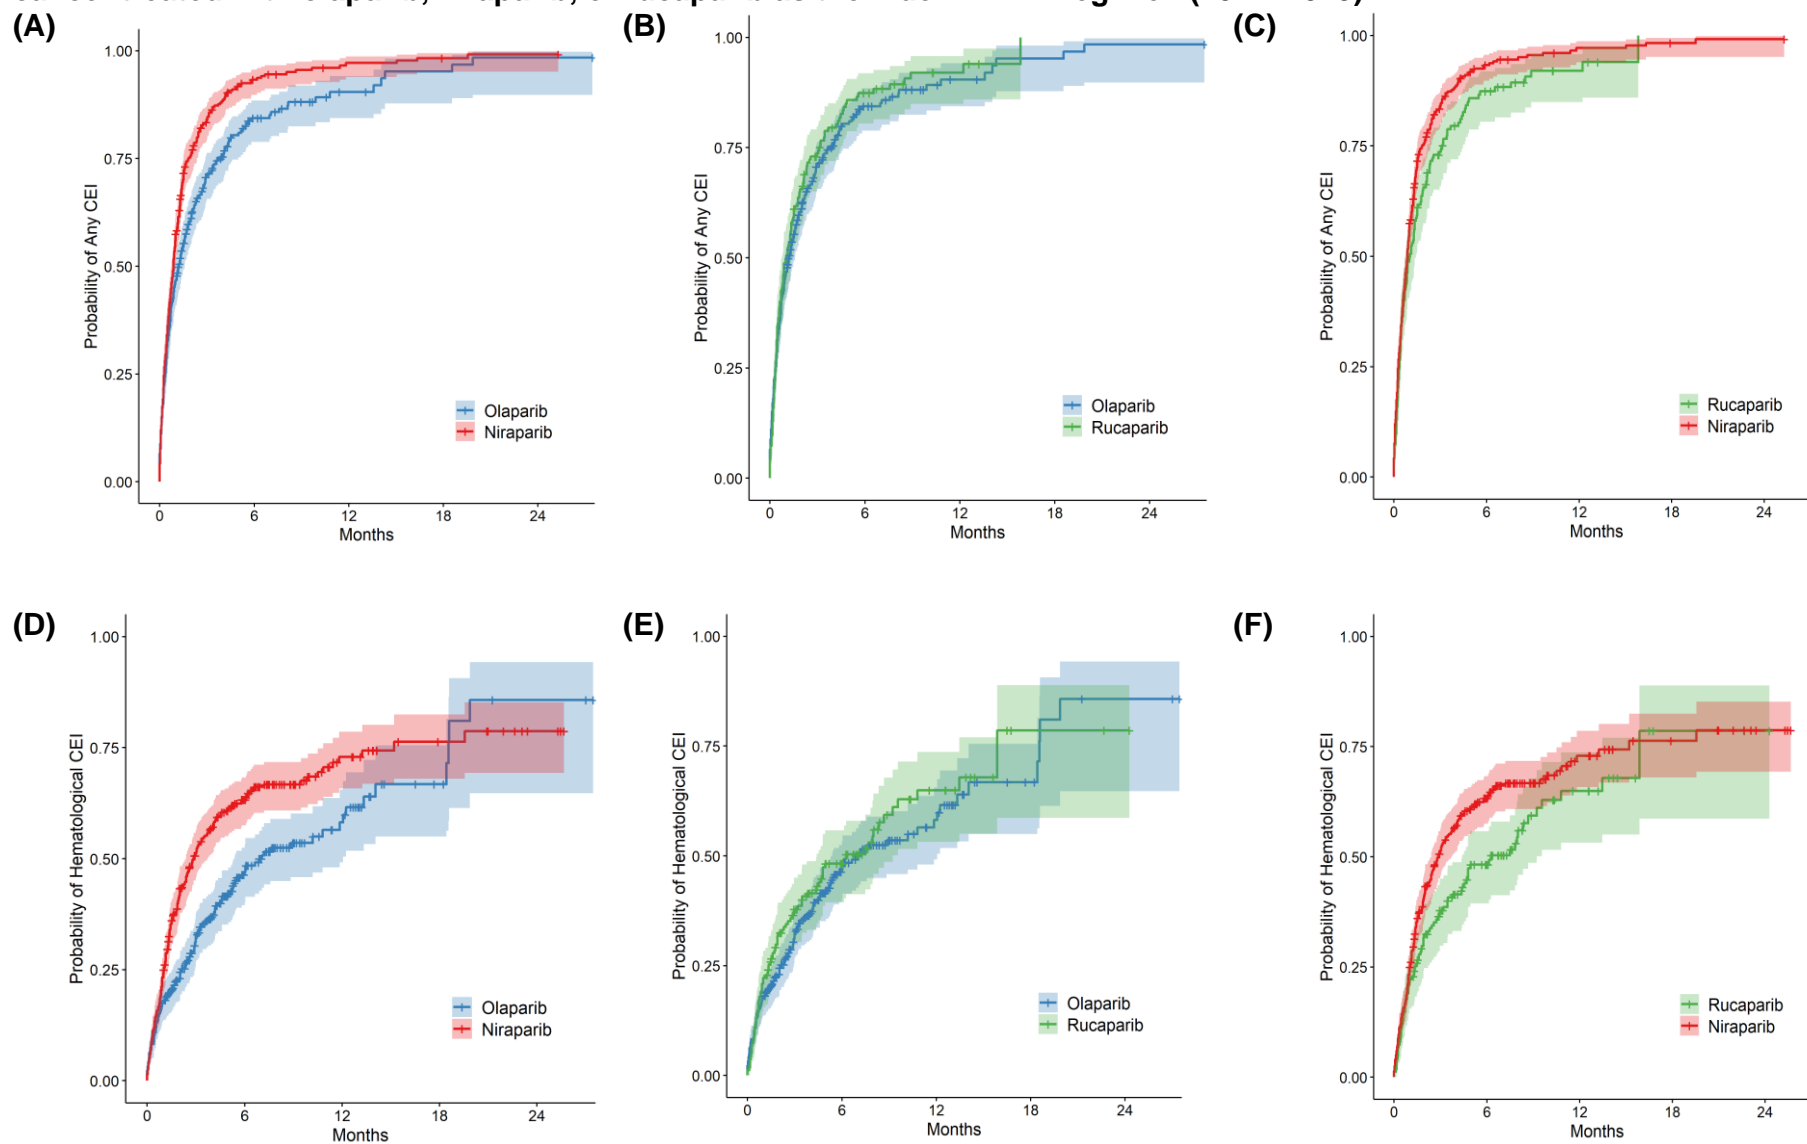

## References

1. AstraZeneca. Lynparza® (olaparib) tablets, for oral use. US prescribing information. 2019.
2. Tesaro. Zejula (niraparib) capsules, for oral use. US prescribing information. 2020.
3. Clovis Oncology. Rubraca® (rucaparib) tablets, for oral use. US prescribing information. 2020.
